# Supplementary material for: Single cell deciphering of progression trajectories of the tumor ecosystem in head and neck cancer
Source: PubMed Central journal article supplement (PMC10959966; doi:10.1038/s41467-024-46912-6), 2024-03-22
Supplement: 41467_2024_46912_MOESM3_ESM.pdf [file 41467_2024_46912_MOESM3_ESM.pdf]

Supplementary Datasets

**Supplementary Data 1.** Clinical information of scRNA-seq cohort..

**Supplementary Data 2.** Clinical information of validation cohort 1.

**Supplementary Data 3.** Clinical information of validation cohort 2.

**Supplementary Data 4.** Signature genes from other studies.
